# Supplementary material
Source: Elsevier journal article supplement (https://www.sciencedirect.com/science/article/pii/S1888989120300574)
Supplement: mmc1 [file S1888989120300574:mmc1.pdf]

**Tabla S1. Criterios diagnósticos de EMAR según la CAARMS.**

| <b>Categoría EMAR</b>                                                                    | <b>Definición</b>                                                                                                                                                                                                                                                          |
|------------------------------------------------------------------------------------------|----------------------------------------------------------------------------------------------------------------------------------------------------------------------------------------------------------------------------------------------------------------------------|
| <b>Atenuado</b>                                                                          | Síntomas que no alcanzan el nivel umbral de psicosis debido a su <i>intensidad subumbral</i> (los síntomas no son lo suficientemente graves) o tienen síntomas psicóticos pero con una <i>frecuencia subumbral</i> (los síntomas no ocurren con la suficiente frecuencia). |
| <i><b>Intensidad subumbral</b></i>                                                       | Puntuación en severidad (CAARMS): 3-4 en P1, 3-5 en P2, 3-4 en P3 y/o 4-5 en P4<br>+<br>Puntuación en frecuencia (CAARMS): 3-6 en P1, P2, P3 y/o P4 de la CAARMS durante al menos 1 semana                                                                                 |
| <i><b>Frecuencia subumbral</b></i>                                                       | Puntuación en severidad (CAARMS): 6 en al menos uno de P1, P2, P4 y/o 5-6 en P3<br>+<br>Puntuación en frecuencia (CAARMS): 3 en P1, P2, P3 y/o P4                                                                                                                          |
| <b>Síntomas psicóticos intermitentes</b><br>(Brief Limited Intermittent Symptoms, BLIPS) | Puntuación en severidad (CAARMS): 6 en al menos uno de P1, P2, P4 y/o 5-6 en P3<br>+<br>Puntuación en frecuencia (CAARMS): 4-6 en P1, P2, P3 y/o P4<br>+<br>Síntomas presentes menos de 7 días con remisión sintomática                                                    |
| <b>Grupo de vulnerabilidad</b>                                                           | Trastorno esquizotípico de la personalidad o historia familiar de psicosis en un familiar de primer grado                                                                                                                                                                  |

Nota sobre funcionalidad: Para realizar un diagnóstico debe existir una afectación en la funcionalidad (reducción del 30% en la Escala de Evaluación de la Actividad Global [EEAG] o una puntuación EEAG < 50 puntos).

Abreviaturas: EMAR= Estado mental de alto riesgo; CAARMS= Comprehensive Assessment of At-Risk Mental States; P1= subescala contenido inusual del pensamiento, P2= subescala ideación no bizarra; P3= subescala anomalías perceptivas, P4= subescala lenguaje desorganizado

**Tabla S2. Resultado de las regresiones entre variables latentes y variables dependientes del análisis SEM realizado en 81 pacientes con un PEP.**

| <b>Regresiones</b>                                                        | <b>Estimación</b> | <b>Error Estándar</b> | <b>Valor Z</b> | <b>Valor p</b> |
|---------------------------------------------------------------------------|-------------------|-----------------------|----------------|----------------|
| Síntomas positivos (POS)                                                  |                   |                       |                |                |
| Maltrato infantil (MAL)                                                   | 0.573             | 0.179                 | 3.207          | 0.001          |
| Síntomas negativos (NEG)                                                  |                   |                       |                |                |
| Maltrato infantil (MAL)                                                   | 0.092             | 0.132                 | 0.699          | 0.485          |
| Síntomas depresivos (DEP)                                                 |                   |                       |                |                |
| Maltrato infantil (MAL)                                                   | 0.266             | 0.125                 | 2.123          | 0.034          |
| Dominio relaciones extra-familiares de la SASS (AS1)                      |                   |                       |                |                |
| Síntomas positivos (POS)                                                  | -0.091            | 0.189                 | -0.484         | 0.629          |
| Síntomas negativos (NEG)                                                  | -0.306            | 0.173                 | -1.774         | 0.076          |
| Síntomas depresivos (DEP)                                                 | -0.266            | 0.156                 | -1.706         | 0.088          |
| Maltrato infantil (MAL)                                                   | -0.432            | 0.247                 | -1.748         | 0.080          |
| Dominio ocio y trabajo de la SASS (AS2)                                   |                   |                       |                |                |
| Síntomas positivos (POS)                                                  | -0.012            | 0.165                 | -0.071         | 0.943          |
| Síntomas negativos (NEG)                                                  | -0.338            | 0.152                 | -2.223         | 0.026          |
| Síntomas depresivos (DEP)                                                 | -0.520            | 0.153                 | -3.394         | 0.001          |
| Maltrato infantil (MAL)                                                   | -0.082            | 0.201                 | -0.407         | 0.684          |
| Dominio intereses socioculturales de la SASS (AS3)                        |                   |                       |                |                |
| Síntomas positivos (POS)                                                  | 0.180             | 0.158                 | 1.136          | 0.256          |
| Síntomas negativos (NEG)                                                  | -0.353            | 0.144                 | -2.453         | 0.014          |
| Síntomas depresivos (DEP)                                                 | -0.281            | 0.130                 | -2.167         | 0.030          |
| Maltrato infantil (MAL)                                                   | 0.119             | 0.189                 | 0.631          | 0.528          |
| Dominio relaciones familiares y estrategias conductuales de la SASS (AS4) |                   |                       |                |                |
| Síntomas positivos (POS)                                                  | -0.139            | 0.233                 | -0.597         | 0.551          |
| Síntomas negativos (NEG)                                                  | -0.596            | 0.288                 | -2.069         | 0.039          |
| Síntomas depresivos (DEP)                                                 | -0.368            | 0.219                 | -1.684         | 0.092          |
| Maltrato infantil (MAL)                                                   | -0.728            | 0.392                 | -1.854         | 0.064          |

Abreviaturas: PEP= Primer episodio psicótico; PANSS= *Positive and Negative Syndrome Scale*; SASS= *Social Adaptation Self-evaluation Scale*.

**Figura 1. Relación de las variables clínicas, de maltrato y adaptación social mediante el modelo de ecuaciones estructurales en la submuestra de pacientes con un primer episodio psicótico.**

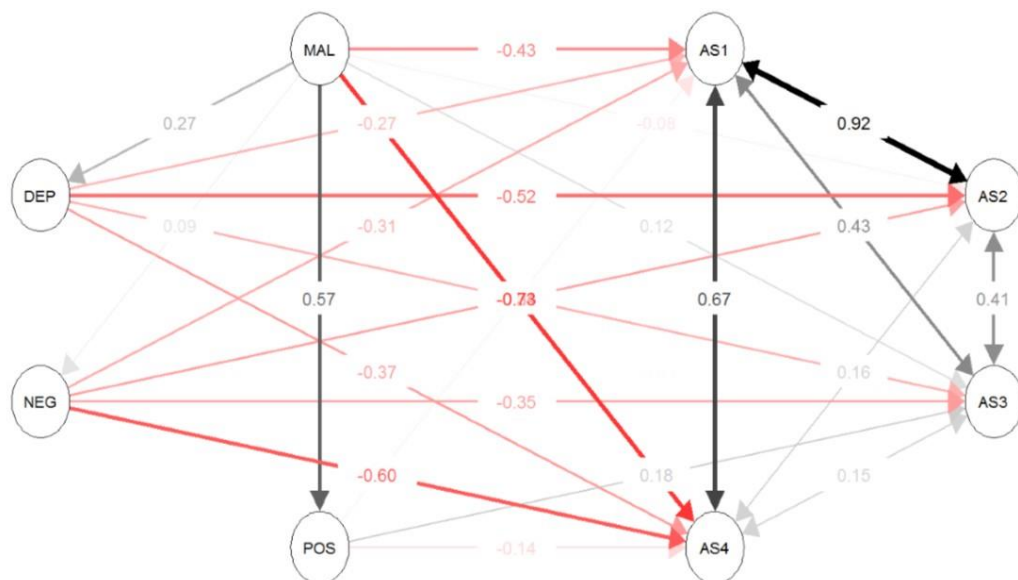

Abreviaturas: MAL= maltrato infantil; DEP= sintomatología depresiva; NEG= síntomas negativos; POS= síntomas positivos; AS1= dominio relaciones extra-familiares de la SASS; AS2=dominio ocio y trabajo de la SASS; AS3= dominio intereses socioculturales de la SASS; AS4= dominio relaciones familiares y estrategias conductuales de la SASS.

La figura describe la relación (parámetros estimados) entre variables latentes que reflejan diferentes dominios de psicopatología, maltrato infantil o adaptación social. Cada variable latente está compuesta por diferentes ítems o escalas tal como se ha definido en el apartado de métodos. Las variables que conforman cada variable latente no se han mostrado en la figura para facilitar la interpretación de los datos.

**Figura S2. Relaciones significativas entre maltrato infantil, psicopatología y dimensiones de adaptación social en el modelo de ecuaciones estructurales realizado en la submuestra de pacientes con un primer episodio psicótico.**

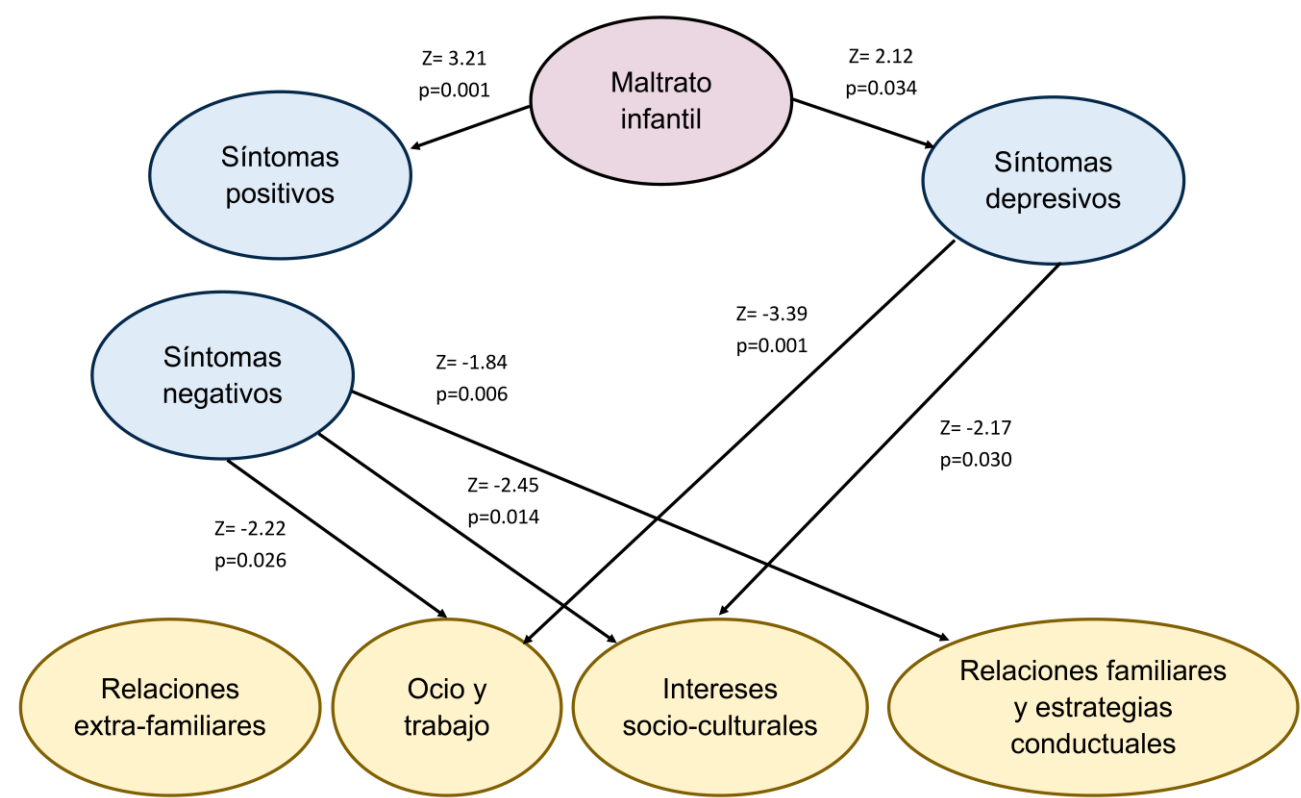

Se muestran puntuaciones estandarizadas (z-scores) de las relaciones entre variables latentes del modelo de ecuaciones estructurales en la submuestra de pacientes con un primer episodio psicótico. Los valores positivos indican asociaciones positivas y los valores negativos relaciones negativas. Dado que las dimensiones de adaptación social están conformadas por ítems de la escala SASS que a mayor puntuación reflejan una mejor adaptación social, los valores negativos de z-scores implican asociaciones con una peor funcionalidad social.
